# Supplementary material for: Versatile approach for functional analysis of human proteins and efficient stable cell line generation using FLP-mediated recombination system
Source: PLoS One. 2018 Mar 28;13(3):e0194887. doi: 10.1371/journal.pone.0194887 (PMC5874048; doi:10.1371/journal.pone.0194887)
Supplement: S4 Supporting Information — (XLSX) [file pone.0194887.s009.xlsx]

## Sheet: Primers
pRS ID	Encoded protein(s)	Vector	Forward primer (BamHI_TEV-L_BshTI_CDS, restriction sites underlined, gene-specifc sequence lower case)	Reverse primer (EcoRV_TEV-R_NheI_CDS, restriction sites underlined, gene-specifc sequence lower case)	Comments
pRS159	EGFP-TEV-THOC5	pKK-EGFP-TEV	GGATCCGAAAACCTGTACTTCCAAGGAACCGGTatgtcatcagaatcgagcaa	GATATCACCCTGAAAATACAAATTCTCGCTAGCtcagcgatggctgaagaatcc
pRS161	THOC5-TEV-EGFP	pKK-TEV-EGFP	the same as for pRS159	GATATCACCCTGAAAATACAAATTCTCGCTAGCgcgatggctgaagaatccctg
pRS162	EGFP-TEV-Coilin	pKK-EGFP-TEV	GGATCCGAAAACCTGTACTTCCAAGGAACCGGTatggcagcttccgagacggttag	GATATCACCCTGAAAATACAAATTCTCGCTAGCtcaggcaggttctgtacttgatg
pRS163	EGFP-TEV-Fibrillarin	pKK-EGFP-TEV	GGATCCGAAAACCTGTACTTCCAAGGAACCGGTatgaagccaggattcagtcc	GATATCACCCTGAAAATACAAATTCTCGCTAGCtcagttcttcaccttggggg
pRS164	EGFP-TEV-Nucleolin	pKK-EGFP-TEV	GGATCCGAAAACCTGTACTTCCAAGGAACCGGTatggtgaagctcgcgaaggc	GATATCACCCTGAAAATACAAATTCTCGCTAGCctattcaaacttcgtcttctttc
pRS165	EGFP-TEV-Numatrin	pKK-EGFP-TEV	GGATCCGAAAACCTGTACTTCCAAGGAACCGGTatggaagattcgatggacatg	GATATCACCCTGAAAATACAAATTCTCGCTAGCttaaagagacttcctccactg
pRS166	EGFP-TEV-Centrin	pKK-EGFP-TEV	GGATCCGAAAACCTGTACTTCCAAGGAACCGGTatggcctccaactttaagaag	GATATCACCCTGAAAATACAAATTCTCGCTAGCttaatagaggctggtctttttc
pRS167	EGFP-TEV-GEGQGQGQGPGRGYAYRS-PCNA	pKK-EGFP-TEV	First PCR: ccagggacaaggacagggccctggcaggggctacgcctacaggagcatgttcgaggcgcgcctggtc	GATATCACCCTGAAAATACAAATTCTCGCTAGCctaagatccttcttcatcctc	To add coding sequence for glycine-rich linker two rounds of PCR were used to amplify the insert. Specific forward primers were used for both reactions. The forward primers were named accordingly. The same reverse primer was used for both reactions. The product of the first reaction was gel purified, diluted and used as a template for second PCR. The product of second PCR reaction was cloned.
			Second PCR: GGATCCGAAAACCTGTACTTCCAAGGAACCGGTatgggcgagggccagggacaaggacagggccctg
pRS836	XRN2-TEV-EGFP, mCherry-NLS	pKK-RNAi-nucCHERRYmiR-TEV-EGFP	GGATCCGAAAACCTGTACTTCCAAGGAACCGGTatgggagtcccggcgttcttc (external primer)	ttcaatctcaaaaaaatgaattctccttctgcacaaggaagac	PCR amplification of fragment 1 of CDS, introduction of silent mutations	All these primers were used for splice-PCR assembly of miRNA-insensitive CDS. External primers were used for final amplification of full-lengths miRNA-insensitive CDS which was cloned into the vector using SLIC
			attcatttttttgagattgaacgttcttcgtgagtatttgg	agaggcgcacgttgtcttcgggctcaggttcactgtcactg	PCR amplification of fragment 2 of CDS, introduction of silent mutations
			ccgaagacaacgtgcgcctctgggaagctggctggaagcag	ggagctgtctgggtcggacatgagcttccgccatgatggag	PCR amplification of fragment 3 of CDS, introduction of silent mutations
			atgtccgacccagacagctccataattgacttctatcctg	GATATCACCCTGAAAATACAAATTCTCGCTAGCattccaattgtatcttcctg (external primer)	PCR amplification of fragment 4 of CDS, introduction of silent mutations
pRS837	XRN2 D233A D235A-TEV-EGFP, mCherry-NLS	pKK-RNAi-nucCHERRYmiR-TEV-EGFP	the same as for pRS836	the same as for pRS836	The same primers as for pRS836, however, template for PCR amplification of fragment 1 encoded mutations D233A D235A

## Sheet: miRNA cassettes
Name	Plasmids	Sequence (contains sequence of restriction enzymes used for cloning)
Neg-miR	All vectors of series pKK-RNAi	gtgcaattggagcgctagtcttaagtgatcctggaggcttgctgaaggctgtatgctgaaatgtactgcgcgtggagacgttttggccactgactgacgtctccacgcagtacatttcaggacacaaggcctgttactagcactcacatggaacaaatggcccagatcctggaggcttgctgaaggctgtatgctgaaatgtactgcgcgtggagacgttttggccactgactgacgtctccacgcagtacatttcaggacacaaggcctgttactagcactcacatggaacaaatggcccagatcctggaggcttgctgaaggctgtatgctgaaatgtactgcgcgtggagacgttttggccactgactgacgtctccacgcagtacatttcaggac…
Xrn2-miR	pRS836, pRS837	gtgcaattggagcgctagtcttaagtgatcctggaggcttgctgaaggctgtatgctgttaagccgaaggaagataaacgttttggccactgactgacgtttatctcttcggcttaacaggacacaaggcctgttactagcactcacatggaacaaatggcccagatcctggaggcttgctgaaggctgtatgctgataacctgacattatcctctggttttggccactgactgaccagaggattgtcaggttatcaggacacaaggcctgttactagcactcacatggaacaaatggcccagatcctggaggcttgctgaaggctgtatgctgactagaatcaggatcactcatgttttggccactgactgacatgagtgactgattctagtcaggac…
